# Supplementary material for: Aquafaba Hydrolysates as Functional Ingredients in Muffin Cakes: Effects on Physicochemical Properties, Quality Attributes, and Antioxidant Activity
Source: MDPI journal article supplement (doi:10.3390/foods14213709), 2025-10-30
Supplement: s1 [file foods-3937612-supplementary.pdf › foods-3937612-supplementary.pdf]

**Table S1.** Composition and their proportions of ingredients utilized in muffin formulation

| Ingredients (%)                     | CM  | AIM | AFHM | ASHM |
|-------------------------------------|-----|-----|------|------|
| Egg                                 | 90  | 90  | 90   | 90   |
| Sugar                               | 60  | 60  | 60   | 60   |
| Shortening                          | 15  | 15  | 15   | 15   |
| Oil                                 | 15  | 15  | 15   | 15   |
| Milk (Whole fat)                    | 60  | 60  | 60   | 60   |
| Wheat flour                         | 100 | 95  | 95   | 95   |
| Baking powder                       | 4.5 | 4.5 | 4.5  | 4.5  |
| Vanilla                             | 1   | 1   | 1    | 1    |
| Aquafaba protein isolate (AI)       | 0   | 5   | 0    | 0    |
| Aquafaba protein hydrolysate (AFHs) | 0   | 0   | 5    | 0    |
| Aquafaba protein hydrolysate(ASHs)  | 0   | 0   | 0    | 5    |

CM: Control muffin cake, AIM Muffin cake e substituted with aquafaba protein isolate, AFHM: Muffin cake substituted with aquafaba hydrolysate obtained by flavourzyme enzyme treatment, ASHM: Muffin cake substituted with aquafaba hydrolysate obtained by savinase enzyme treatment, AI: Aquafaba protein isolate, AFH: Aquafaba hydrolysate obtained by flavourzyme enzyme treatment, ASH: Aquafaba hydrolysate obtained by savinase enzyme treatment.

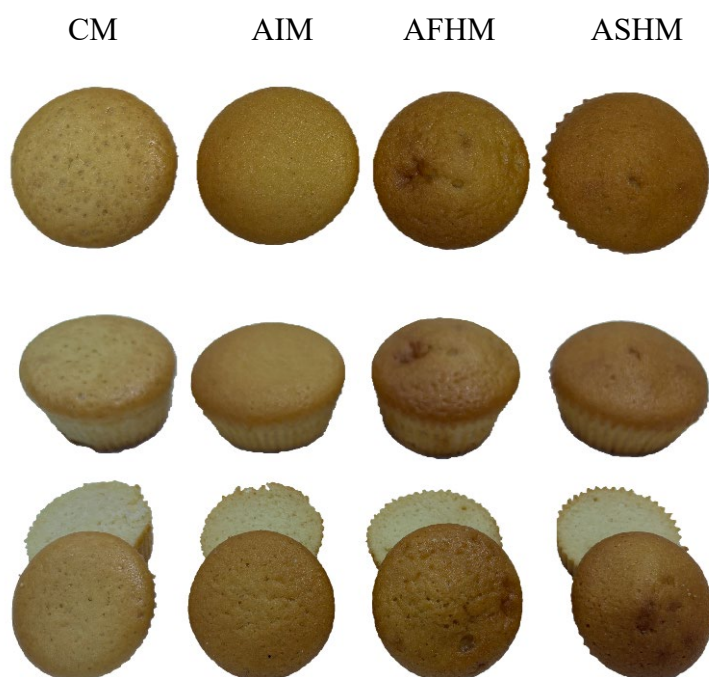

**Figure S1.** Muffin Cake Samples

CM: Control muffin cake, AIM Muffin cake e substituted with aquafaba protein isolate, AFHM: Muffin cake substituted with aquafaba hydrolysate obtained by flavourzyme enzyme treatment, ASHM: Muffin cake substituted with aquafaba hydrolysate obtained by savinase enzyme treatment,
